# Supplementary material for: Synthesis and thermodynamic study of transition metal ion (Mn2+, Co2+, Cu2+, and Zn2+) exchanged zeolites A and Y
Source: Royal Society of Chemistry journal article supplement (doi:10.1039/c5cp07918g), 2016-01-01
Supplement: c5cp07918g1.pdf [file c5cp07918g1.pdf]

### Supplemental information:

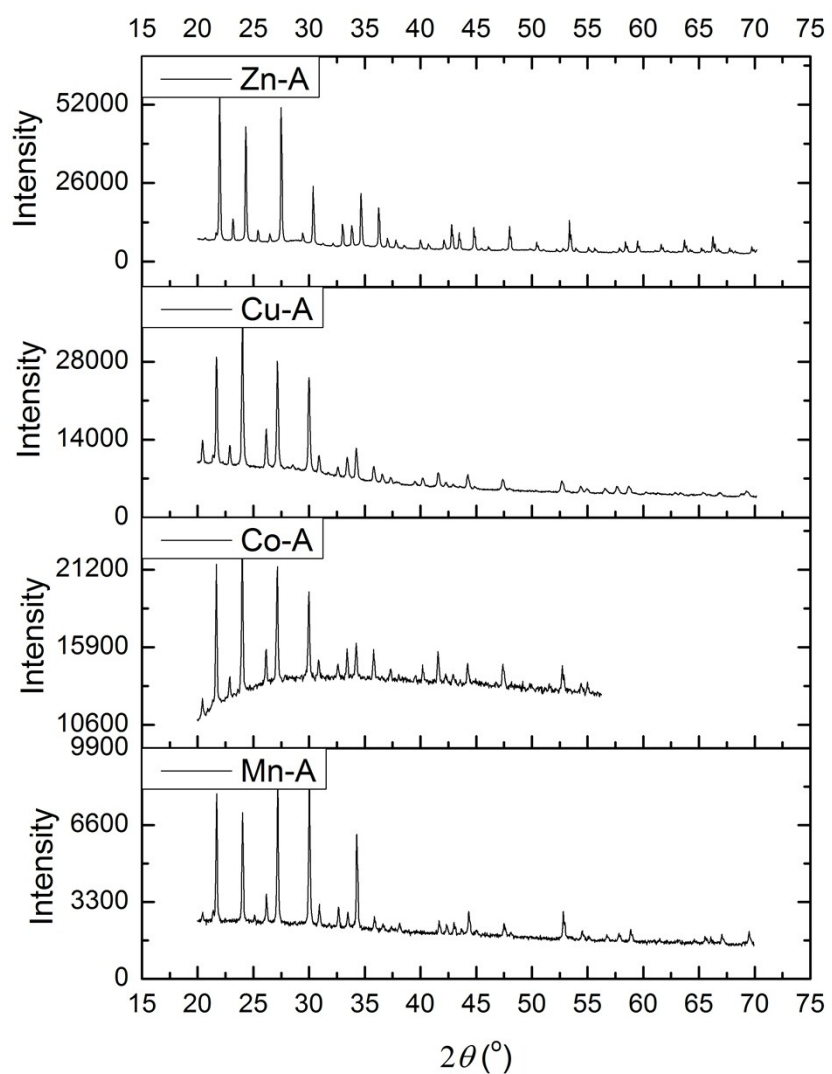

**Figure 1** XRD patterns of transition metal ion exchanged zeolite A, sample XRD patterns match with previously reported data [14-17].

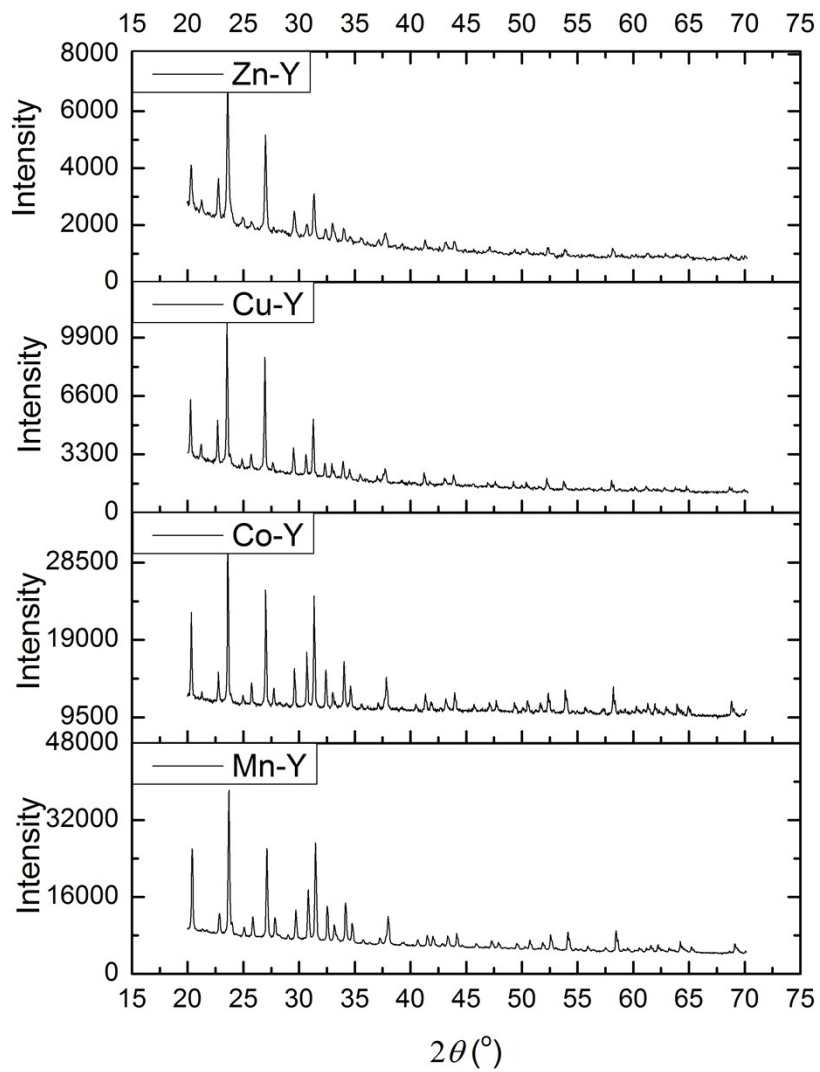

**Figure 2** XRD patterns of transition metal ion exchanged zeolite Y, sample XRD patterns match with previously reported data [18-21].

**Table 1.** Thermochemical cycle for calculation of enthalpy of formation from oxides ( $\Delta H_{f,ox}$ ) for hydrated transition metal exchanged zeolite A and Y

| Reactions                                                                                                                                                                   | Enthalpy             |
|-----------------------------------------------------------------------------------------------------------------------------------------------------------------------------|----------------------|
| $xNa_2O(s, 25^\circ C) + yMO(s, 25^\circ C) + iAl_2O_3(s, 25^\circ C) + jSiO_2(s, 25^\circ C) + qH_2O(s, 25^\circ C) \rightarrow Na_xM_yAl_iSi_jO_2(H_2O)_q(s, 25^\circ C)$ | $\Delta H_{f,ox}(M)$ |
| $Na_2O(s, 25^\circ C) \rightarrow Na_2O(soln, 700^\circ C)$                                                                                                                 | $\Delta H_1$         |
| $MO(s, 25^\circ C) \rightarrow MO(soln, 700^\circ C)$                                                                                                                       | $\Delta H_2$         |
| $Al_2O_3(s, 25^\circ C) \rightarrow Al_2O_3(soln, 700^\circ C)$                                                                                                             | $\Delta H_3$         |
| $SiO_2(s, 25^\circ C) \rightarrow SiO_2(soln, 700^\circ C)$                                                                                                                 | $\Delta H_4$         |
| $H_2O(s, 25^\circ C) \rightarrow H_2O(g, 700^\circ C)$                                                                                                                      | $\Delta H_5$         |
| $Na_xM_yAl_iSi_jO_2(s, 25^\circ C) \rightarrow Na_xM_yAl_iSi_jO_2(soln, 700^\circ C)$                                                                                       | $\Delta H_6$         |
| $\Delta H_{f,ox}(M) = (x/2)\Delta H_1 + y\Delta H_2 + (i/2)\Delta H_3 + j\Delta H_4 + q\Delta H_5 - \Delta H_6$                                                             |                      |

**Table 2.** Drop Solution Enthalpies for Constituent Oxides in Lead Borate at 700 °C and Formation Enthalpies from Elements at 25 °C for Oxides and Ions in Aqueous Solution .

| Material          | Formula                        | $\Delta H_{ds}(kJ mol^{-1})$ | $\Delta H_{f,el}(kJ mol^{-1})$ |
|-------------------|--------------------------------|------------------------------|--------------------------------|
| Quartz            | SiO <sub>2</sub>               | 39.13±0.32 <sup>a</sup>      | -910.70±1.00 <sup>b</sup>      |
| $\alpha$ -Alumina | Al <sub>2</sub> O <sub>3</sub> | 107.93±0.98 <sup>a</sup>     | -1675.70±1.30 <sup>b</sup>     |
| Water             | H <sub>2</sub> O               | 68.98±0.10 <sup>a</sup>      | -285.08±0.10 <sup>b</sup>      |
| Sodium Oxide      | Na <sub>2</sub> O              | -113.10±0.83 <sup>a</sup>    | -414.84±0.25 <sup>b</sup>      |
| Manganese Oxide   | MnO                            | 43.1±0.8 <sup>c</sup>        | -385.22±0.46 <sup>b</sup>      |
| Cobalt Oxide      | CoO                            | 57.23±0.84 <sup>d</sup>      | -237.94±1.26 <sup>b</sup>      |
| Copper Oxide      | CuO                            | 67.9±0.6 <sup>e</sup>        | -157.32±1.26 <sup>b</sup>      |
| Zinc Oxide        | ZnO                            | 51.98±0.88 <sup>d</sup>      | -35.05±0.27 <sup>b</sup>       |
| Sodium ion        | Na <sup>+</sup> (aq, M=1)      | -                            | -240.30±0.06 <sup>b</sup>      |
| Manganese ion     | Mn <sup>2+</sup> (aq, M=1)     | -                            | -220.70±0.12 <sup>b</sup>      |
| Cobalt ion        | Co <sup>2+</sup> (aq, M=1)     | -                            | -58.20±0.50 <sup>b</sup>       |
| Copper ion        | Cu <sup>2+</sup> (aq, M=1)     | -                            | 64.77±0.10 <sup>b</sup>        |
| Zinc ion          | Zn <sup>2+</sup> (aq, M=1)     | -                            | -153.39±0.20 <sup>b</sup>      |

<sup>a</sup> I. Kiseleva, A. Navrotsky, I.A. Belitsky and B.A. Fursenko, *American Mineralogist*, 1996, **81**, 658-667.

<sup>b</sup> R. A. Robie, B. S. Hemingway, u.s. geological survey bullet in 1452, 1995.

<sup>c</sup> S. Fritsch and A. Navrotsky, *Journal of the American Ceramic Society*, 1996, **79**, 1761-1768.

<sup>d</sup> R. k. Allada, E. Peltier, A. Navrotsky, W. H. Casey, C. A. Johnson, H. T. Berbeco and D. L. Sparks, *Clays and Clay Minerals*, 2006, **54**, 409-417.

<sup>e</sup> Z. Zhou and A. Navrotsky, *Journal of Materials Research*, 1992, **7**, 2920-2935.

**Table 3.** Thermochemical cycle for calculation of enthalpy of formation from elements ( $\Delta H_{f,el}$ ) at 25°C for transition metal exchanged zeolite A and Y

| <b>Reactions</b>                                                                                                                                                                                                                                                              | <b>Enthalpy</b>      |
|-------------------------------------------------------------------------------------------------------------------------------------------------------------------------------------------------------------------------------------------------------------------------------|----------------------|
| $x\text{Na}_2\text{O}(s, 25^\circ\text{C}) + y\text{MO}(s, 25^\circ\text{C}) + i\text{Al}_2\text{O}_3(s, 25^\circ\text{C}) + j\text{SiO}_2(s, 25^\circ\text{C}) + q\text{H}_2\text{O}(s, 25^\circ\text{C}) \rightarrow \text{Na}_x\text{M}_y\text{Al}_i\text{Si}_j\text{O}_2$ | $\Delta H_{f,ox}(M)$ |
| $(\text{H}_2, \text{O}_2)(s, 25^\circ\text{C}) \rightarrow \text{Na}_2\text{O}(s, 25^\circ\text{C})$                                                                                                                                                                          | $\Delta H_1^\circ$   |
| $\text{Elements} \rightarrow \text{MO}(s, 25^\circ\text{C})$                                                                                                                                                                                                                  | $\Delta H_2^\circ$   |
| $\text{Elements} \rightarrow \text{Al}_2\text{O}_3(s, 25^\circ\text{C})$                                                                                                                                                                                                      | $\Delta H_3^\circ$   |
| $\text{Elements} \rightarrow \text{SiO}_2(s, 25^\circ\text{C})$                                                                                                                                                                                                               | $\Delta H_4^\circ$   |
| $\text{Elements} \rightarrow \text{H}_2\text{O}(s, 25^\circ\text{C})$                                                                                                                                                                                                         | $\Delta H_5^\circ$   |
| $\text{Elements} \rightarrow \text{Na}_x\text{M}_y\text{Al}_i\text{Si}_j\text{O}_2(s, 25^\circ\text{C})$                                                                                                                                                                      | $\Delta H_6^\circ$   |
| $\Delta H_{f,el}(M\text{-zeolite}) = (x/2)\Delta H_1^\circ + y\Delta H_2^\circ + (i/2)\Delta H_3^\circ + j\Delta H_4^\circ + q\Delta H_5^\circ + \Delta H_6^\circ$                                                                                                            |                      |

### Calculation of enthalpies of exchange $\Delta H_{ex}$ :

**Step 1:** Generalize the compositions of M-zeolite according to Na-zeolite A and Y, the metal content is calculated by use exchange percentage, for example:

For Mn-zeolite A: Na=0.481×(1-0.999)=0.0005; Mn=0.481×0.999/2=0.2403.

**Table 4.** The generalized compositions of M-zeolites

| Ratio | 2M/(2M+Na) | Na     | M     | Al    | Si    | O |
|-------|------------|--------|-------|-------|-------|---|
| Na-A  |            | 0.481  |       | 0.492 | 0.510 | 2 |
| Mn-A  | 0.999      | 0.0005 | 0.240 | 0.492 | 0.510 | 2 |
| Co-A  | 0.996      | 0.0019 | 0.239 | 0.492 | 0.510 | 2 |
| Cu-A  | 0.980      | 0.0096 | 0.236 | 0.492 | 0.510 | 2 |
| Zn-A  | 0.998      | 0.0010 | 0.240 | 0.492 | 0.510 | 2 |
| Na-Y  |            | 0.276  |       | 0.284 | 0.716 | 2 |
| Mn-Y  | 0.972      | 0.008  | 0.134 | 0.284 | 0.716 | 2 |
| Co-Y  | 0.846      | 0.043  | 0.117 | 0.284 | 0.716 | 2 |
| Cu-Y  | 0.963      | 0.010  | 0.133 | 0.284 | 0.716 | 2 |
| Zn-Y  | 0.973      | 0.007  | 0.134 | 0.284 | 0.716 | 2 |

**Step 2:** The corresponding drop solution enthalpies are listed in first column (S.I. Table 5). According to the composition in Step 1, calculate the drop solution enthalpies of anhydrous M-zeolite by Na correction.

$$\Delta H_{ds}(M\text{-zeolite}) = \{\Delta H_{ds}(\text{Na, M-zeolite}) - x\Delta H_{ds}(\text{Na-zeolite})\} / y \quad (1)$$

Then, calculate the enthalpies of formation from oxides for anhydrous M-zeolite  $\Delta H_{f,ox}(M)$  by using equation (2):

$$\begin{aligned} \Delta H_{f,ox}(M\text{-zeolite}) &= \sum_{i=1}^5 \Delta H_{ds}(oxides) - \Delta H_{ds}(M\text{-zeolite}) \\ &= (x/2)\Delta H_{ds}(\text{Na}_2\text{O}) + y\Delta H_{ds}(\text{MO}) + (i/2)\Delta H_{ds}(\text{Al}_2\text{O}_3) + j\Delta H_{ds}(\text{SiO}_2) \\ &\quad + q\Delta H_{ds}(\text{H}_2\text{O}) - \Delta H_{ds}(M\text{-zeolite}) \quad (2) \end{aligned}$$

**Table 5.** Drop solution enthalpies before and after Na correction, formation enthalpies from oxides for pure M-zeolites.

|      | $\Delta H_{ds}(\text{hy})$<br>(kJ mol <sup>-1</sup> ) | $\Delta H_{ds}(\text{dhy})$<br>(kJ mol <sup>-1</sup> ) | $\Delta H_{ds}(\text{pure})$<br>(kJ mol <sup>-1</sup> ) | $\Delta H_{f,ox}(\text{pure})$<br>(kJ mol <sup>-1</sup> ) |
|------|-------------------------------------------------------|--------------------------------------------------------|---------------------------------------------------------|-----------------------------------------------------------|
| Mn-A | 131.00(8) ± 1.00                                      | 34.47 ± 0.99                                           | 34.42 ± 0.99                                            | 22.47 ± 1.15                                              |
| Co-A | 110.65(9) ± 1.67                                      | 10.04 ± 1.66                                           | 9.76 ± 1.66                                             | 50.65 ± 1.71                                              |
| Cu-A | 104.20(8) ± 5.14                                      | 10.43 ± 5.11                                           | 9.04 ± 5.14                                             | 54.76 ± 5.15                                              |
| Zn-A | 123.26(8) ± 1.30                                      | 41.59 ± 1.30                                           | 41.48 ± 1.30                                            | 17.58 ± 1.36                                              |
| Mn-Y | 126.71(8) ± 1.81                                      | 41.27 ± 1.79                                           | 41.21 ± 1.81                                            | 11.72 ± 1.98                                              |
| Co-Y | 148.66(8) ± 2.15                                      | 35.23 ± 2.07                                           | 34.62 ± 2.15                                            | 23.41 ± 2.19                                              |
| Cu-Y | 135.56(8) ± 1.70                                      | 23.05 ± 1.68                                           | 22.78 ± 1.70                                            | 34.12 ± 1.74                                              |
| Zn-Y | 136.56(8) ± 1.71                                      | 41.62 ± 1.70                                           | 41.56 ± 1.71                                            | 12.68 ± 1.75                                              |

$\Delta H_{ds}(\text{hy})$ - drop solution enthalpies for hydrous M-zeolites;

$\Delta H_{ds}(\text{dhy})$ - drop solution enthalpies for anhydrous M-zeolites;

$\Delta H_{ds}(\text{pure})$ - Na corrected drop solution enthalpies for anhydrous M-zeolites;

$\Delta H_{f,ox}(\text{pure})$ - formation enthalpies from oxides for Na corrected anhydrous M-zeolites.

**Step 3:** Calculate the formation enthalpies from elements by using equation (3), the  $H_{f,ox}(M\text{-zeolite})$  is from  $\Delta H_{f,ox}(\text{pure})$  in Table 5.

$$\Delta H_{f,el}(M\text{-zeolite}) = \sum_{i=1}^5 \Delta H_{f,el}^{\circ}(\text{oxides}) + \Delta H_{f,ox}(M\text{-zeolite})$$

$$= (x/2)\Delta H_{f,el}^{\circ}(\text{Na}_2\text{O},s) + y\Delta H_{f,el}^{\circ}(\text{MO},s) + (i/2)\Delta H_{f,el}^{\circ}(\text{Al}_2\text{O}_3,s) + j\Delta H_{f,el}^{\circ}(\text{SiO}_2,s) + \Delta H_{f,ox}(M\text{-zeolite}) \quad (3)$$

**Table 6.** Formation enthalpies from elements for M-zeolite.

|             | $\Delta H_{f,el}(\text{dhy})$ (kJ mol <sup>-1</sup> ) |
|-------------|-------------------------------------------------------|
| <b>Mn-A</b> | -947.49±1.31                                          |
| <b>Co-A</b> | -883.81±1.87                                          |
| <b>Cu-A</b> | -860.28±5.50                                          |
| <b>Zn-A</b> | -867.99±1.52                                          |
| <b>Mn-Y</b> | -931.45±2.12                                          |
| <b>Co-Y</b> | -899.43±2.21                                          |
| <b>Cu-Y</b> | -877.60±1.92                                          |
| <b>Zn-Y</b> | -882.17±1.90                                          |

**Step 4:** Calculate the enthalpies of exchange by using equation (4):

$$\Delta H_{ex} = \Delta H_{f,el}(M\text{-zeolite}) + x \Delta H_{f,el}(\text{Na}^+) - \Delta H_{f,el}(\text{Na-zeolite}) - (x/2)\Delta H_{f,el}(M^{2+}) \quad (4)$$

**Table 7.** List of enthalpies of exchange for M-zeolite.

|             | $\Delta H_{ex}$ (kJ mol <sup>-1</sup> ) |
|-------------|-----------------------------------------|
| <b>Mn-A</b> | 32.24±1.78                              |
| <b>Co-A</b> | 56.76±2.22                              |
| <b>Cu-A</b> | 50.66±5.63                              |
| <b>Zn-A</b> | 95.52±1.94                              |
| <b>Mn-Y</b> | 3.83±2.40                               |
| <b>Co-Y</b> | 10.86±2.48                              |
| <b>Cu-Y</b> | 15.72±2.23                              |
| <b>Zn-Y</b> | 41.26±2.22                              |
